# Supplementary material for: The Effects of Lycopene on the Methylation of the GSTP1 Promoter and Global Methylation in Prostatic Cancer Cell Lines PC3 and LNCaP
Source: Int J Endocrinol. 2014 Oct 20;2014:620165. doi: 10.1155/2014/620165 (PMC4217342; doi:10.1155/2014/620165)
Supplement: Supplementary file 1 — Supplementary Figure 1. Structure of the human GSTP1 gene. An enlarged view of the 423-bp promoter region shows the transcriptional start site (TSS) and 39 CpG sites (purple dashes). Dark green boxes denote CpG islands associated with the 5' untranscriptional region and coding region of GSTP1. Black boxes indicate exons of GSTP1. CpG, cytosine-guanine dinucleotide. Supplementary Figure 2. Bisulfite sequencing of the GSTP1 promoter region, LINE-1 and ALU. Numbers represent CpG sites; Boxes represent locations of sequencing primers [file 620165.f1.zip]

Archive with 3 entries (2 files):
- 620165.f1/
- 620165.f1/Supplymentary 1.eps
- 620165.f1/Supplymentary 2.eps
